# Supplementary material for: Perceptions of Sheep Farmers and District Veterinarians towards Sheep Disease Management in New South Wales, Australia
Source: MDPI journal article supplement (doi:10.3390/ani14081249), 2024-04-22
Supplement: s1 [file s1]

|                                                                                                                   |                                              |                                                                                                                                                                |
|-------------------------------------------------------------------------------------------------------------------|----------------------------------------------|----------------------------------------------------------------------------------------------------------------------------------------------------------------|
|  <b>THE UNIVERSITY OF SYDNEY</b> |                                              | <b>Sydney School of Veterinary Science</b><br>Faculty of Science                                                                                               |
|                                                                                                                   | 425 Werombi Road, Camden, NSW 2570 AUSTRALIA |                                                                                                                                                                |
| Associate Professor Om Dhungyel <i>Principal Research Fellow</i>                                                  |                                              | Shute Building C01<br>Telephone +61 2 9351 1606<br>Facsimile +61 2 9351 1618 email<br><a href="mailto:om.dhungyel@sydney.edu.au">om.dhungyel@sydney.edu.au</a> |

## District Veterinarian sheep health survey questionnaire

**Consent for Participation:** I have read through the participation information and agree to the part of this questionnaire survey study. **Yes/No**

### Aims of the questionnaire

1. Determine what form of information is most likely dispersed to producers
2. Identify what the major problems for producers are regarding sheep health
3. Identify the diseases that are the most common and difficult to control within districts
4. Determine what knowledge producers would benefit most from regarding disease management

### District Veterinarian/Biosecurity Officer Information:

Local Land Services (LLS) region: \_\_\_\_\_

#### 1. What are the most common reasons you are called out to properties?

(Rank Numerically from 1-10, with 1 = most common and 10 = least common)

- ☐ Reproduction issues
- ☐ Disease outbreaks
- ☐ Parasitology
- ☐ Vaccination
- ☐ Lamb mortality
- ☐ Trauma
- ☐ Nutrition advice
- ☐ Husbandry advice
- ☐ Sudden death of livestock
- ☐ Other \_\_\_\_\_

**2. What areas do you feel farmers would benefit from having more knowledge around? (Tick all that apply)**

- |                                                                    |                                                    |
|--------------------------------------------------------------------|----------------------------------------------------|
| <input type="checkbox"/> Reproduction issues                       | <input type="checkbox"/> Lamb mortality            |
| <input type="checkbox"/> Common diseases                           | <input type="checkbox"/> Trauma                    |
| <input type="checkbox"/> Quarantine and on farm disease management | <input type="checkbox"/> Nutrition advice          |
| <input type="checkbox"/> Biosecurity                               | <input type="checkbox"/> Husbandry advice          |
| <input type="checkbox"/> Parasite management                       | <input type="checkbox"/> Sudden death of livestock |
| <input type="checkbox"/> Parasite lifecycles                       | <input type="checkbox"/> Other _____               |
| <input type="checkbox"/> Which vaccines to use                     | <input type="checkbox"/> None                      |
| <input type="checkbox"/> Correct vaccination use                   |                                                    |

**3. How are you most likely to disperse information to sheep producers? (Rank Numerically from 1-10, with 1 = most likely and 10 = least likely)**

- ☐ In person
- ☐ Over the phone
- ☐ Famer Meetings/Workshops
- ☐ At industry events
- ☐ Through pamphlets and other written media
- ☐ Through email
- ☐ At town hubs (E.g sale yards, Pubs)
- ☐ Through collaboration with government bodies (e.g department of industries)
- ☐ Through collaboration with industry bodies and groups (E.g AWEC, MLA)
- ☐ Other \_\_\_\_\_

**4. What do you consider to be the major problems facing sheep producers in your District in regards to sheep health?**

(Rank numerically from 1-10, with 1 = greatest concern and 10 = least concern)

- ☐ Reproduction issues
- ☐ Disease outbreaks
- ☐ Parasitology
- ☐ Vaccination
- ☐ Lamb mortality
- ☐ Trauma
- ☐ Nutrition issues
- ☐ Husbandry issues
- ☐ Sudden death of livestock
- ☐ Other \_\_\_\_\_

**5. In terms of endemic sheep diseases, which are the most common and difficult to control diseases in your district**

(Circle each on a scale of 1-5, with 1 being severely concerning and 5 being of no concern)

|                       |   |   |   |   |   |
|-----------------------|---|---|---|---|---|
| Ovine Johne's Disease | 1 | 2 | 3 | 4 | 5 |
| Internal Parasites    | 1 | 2 | 3 | 4 | 5 |
| External Parasites    | 1 | 2 | 3 | 4 | 5 |
| Footrot               | 1 | 2 | 3 | 4 | 5 |
| Clostridial Diseases  | 1 | 2 | 3 | 4 | 5 |
| Other _____           | 1 | 2 | 3 | 4 | 5 |
